# Supplementary material for: 4-Hydroxybenzoato-rare earth(iii) complexes – syntheses, a structural goldmine from coordination diversity and improved corrosion inhibition behaviour
Source: Royal Society of Chemistry journal article supplement (doi:10.1039/d3nj02735j), 2023-01-01
Supplement: d3nj02735j1.pdf [file d3nj02735j1.pdf]

## SUPPLEMENTARY INFORMATION

### 4-Hydroxybenzoato-Rare Earth(III) Complexes – Syntheses, a Structural Goldmine from Coordination Diversity and Improved Corrosion Inhibition Behaviour

Joshua S. Moon<sup>a</sup>, Zhifang Guo<sup>b</sup>, Owen Beaumont<sup>a</sup>, Sophie Hamilton<sup>b</sup>, Guillaume Bousrez<sup>b</sup>, Eleanor Mottram<sup>b</sup>, Jun Wang<sup>b</sup>, Anthony E. Somers<sup>c</sup>, Glen B. Deacon<sup>a</sup> and Peter C. Junk<sup>b\*</sup>

<sup>a</sup>School of Chemistry, Monash University, Clayton, Vic, 3800, Australia.

<sup>b</sup>College of Science & Engineering, James Cook University, Townsville, Qld, 4811, Australia.

<sup>c</sup>Institute for Frontier Materials, Deakin University, Burwood, 3125, VIC, Australia. \* Correspondence: peter.junk@jcu.edu.au.

#### Contents

1. **Preparation of 4-Hydroxybenzoato Rare Earth Aqua Complexes and Rare Earth 4hob Complexes with 2,2'-Bipyridine**
2. **Figure S1** PXRD traces of the bulk products for the aqua reactions.
3. **Figure S2** Comparison of the PXRD traces for types **a**, **b** and **c** dimers, generated from the crystal data for RE = Tb.
4. **Figure S3** PXRD traces of (4-hydroxybenzoato)Ln(III) complexes (Ln = Pr and Y) at room temperature compared to their simulated patterns.
5. **Figure S4** PXRD traces of dried bulk Ho product at room temperature compared to its simulated patterns.
6. **Figure S5** PXRD traces for [RE(4hob)<sub>3</sub>(bpy)]<sub>2</sub> (RE = Pr, Nd, Sm, Eu, Gd, Tb, Dy, Er, Yb, Lu, Y) bulk products at room temperature.
7. **Figure S6** Tafel plots for AS1020 mild steel after 24 h in control and inhibitor solutions.
8. **Table S1** Hydrogen bonding Parameters [d/Å and </°] for the compounds
9. **Table S2** Selected distances and bond lengths (Å) for the type b dimers, [RE<sub>2</sub>(4hob)<sub>6</sub>(H<sub>2</sub>O)<sub>4</sub>]·2H<sub>2</sub>O.
10. **Table S3** Selected distances and bond lengths (Å) for the type c dimers, [RE<sub>2</sub>(4hob)<sub>6</sub>(H<sub>2</sub>O)<sub>6</sub>]·10H<sub>2</sub>O.
11. **X-ray crystallography**
12. **Table S4** Structural and refinement data for RE-4hob species.
13. **References**

## 1. Preparation of 4-Hydroxybenzoato Rare Earth Aqua Complexes

The complexes were synthesised by reaction between sodium 4-hydroxybenzoate prepared *in situ* unless noted, and a rare earth salt ( $\text{RECl}_3 \cdot x\text{H}_2\text{O}$ ; RE = Nd, Sm) in a 3:1 mole ratio, typically on a 0.5-1.5 mmol scale (by metal salt). Reactions were conducted in aqueous media at ambient temperature. Precipitates were collected for  $\text{RE}(\text{4hob})_3$  (RE = Nd, Sm).

### Characterization of the Aqua Complexes for which structures could not be obtained follow.

**Nd(4hob)<sub>3</sub>(H<sub>2</sub>O)<sub>2</sub>.** Fibrous bunches of pale purple needles (yield: 63%) dec. 268 °C.  $\text{C}_{21}\text{H}_{19}\text{NdO}_{11}$  (591.61) calculated: C 42.63, H 3.24, Nd 24.38%; found C 42.22, H 3.44, Nd 23.87%.

IR ( $\text{cm}^{-1}$ ): 3260s, v br, 1655vw, 1601s, 1509vs, 1413vs, 1252vs, 1176s, 1102m, 1015w, 914vw, 853m, 785vs, 699s.

**Sm(4hob)<sub>3</sub>(H<sub>2</sub>O)<sub>2</sub>.** White precipitate (yield: 91%) dec. 276 °C.  $\text{C}_{21}\text{H}_{19}\text{SmO}_{11}$  (597.73) calculated: C 42.20, H 3.20, Sm 25.16%; found C 42.47, H 3.28, Sm 24.83%.

IR ( $\text{cm}^{-1}$ ): 3299s, v br, 1698vw, 1599s, 1501s, 1397vs, 1238s, 1168vs, 1101m, 1013vw, 966vw, 854m, 784vs, 699m.

### Preparation of Rare Earth 4hob Complexes with 2,2'-Bipyridine

The complexes were synthesised by a reaction between sodium 4-hydroxybenzoate prepared *in situ*, 2,2'-bipyridine (bpy), and a rare earth salt ( $\text{REX}_3 \cdot x\text{H}_2\text{O}$ ; X =  $\text{Cl}^-$  or  $\text{NO}_3^-$ , or  $\frac{1}{2} \text{SO}_4^{2-}$  (for Ce only) in a 3:1:1 mole ratio, on a 1 mmol scale (by metal salt). Reactions were conducted in aqueous medium at pH ~6. Precipitates were collected for complexes  $\text{RE}(\text{4hob})_3(\text{bpy})$  (RE = La, Ce, Pr, Nd, Sm, Eu, Gd, Ho, Y, Er, Yb Lu).

### Characterization of the Complexes with 2,2'-Bipyridine for which structures could not be obtained follow.

**La(4hob)<sub>3</sub>(bpy).** White precipitate (yield: 12%) dec. 188 °C.  $\text{C}_{31}\text{H}_{23}\text{N}_2\text{LaO}_9$  (706.43) calculated: C 52.71, H 3.28, N 3.97, La 19.66%; found C 53.09, H 3.37, N 4.03, La 19.38%.

IR ( $\text{cm}^{-1}$ ): 3076w, 1594m, 1525m, 1505m, 1381s, 1273m, 1239m, 1165m, 1098w, 1008w, 855m, 785m, 757m, 700w.

**Ce(4hob)<sub>3</sub>(bpy).** White precipitate (yield: 14%) dec. 152 °C.  $\text{C}_{31}\text{H}_{23}\text{N}_2\text{CeO}_9$  (707.64) calculated: C 52.62, H 3.28, N 3.96, Ce 19.80%; found C 52.96, H 3.41, N 4.02, Ce 19.68%.

IR ( $\text{cm}^{-1}$ ): 3072w, 1594m, 1526m, 1505m, 1384s, 1274m, 1239m, 1165m, 1096m, 1009w, 855w, 785m, 757m, 701w.

**Pr(4hob)<sub>3</sub>(bpy).** Green precipitate (yield: 31%) dec. 181 °C.  $\text{C}_{31}\text{H}_{23}\text{N}_2\text{PrO}_9$  (708.43) calculated: C 52.56, H 3.27, N 3.95, Pr 19.89%; found C 51.96, H 3.41, N 4.03, Pr 19.56%.

IR ( $\text{cm}^{-1}$ ): 3076w, 1596m, 1529m, 1505m, 1384s, 1275m, 1239m, 1165m, 1099w, 1062w, 1010w, 865w, 785m, 757m, 737w, 701w.

**Nd(4hob)<sub>3</sub>(bpy).** Blue precipitate (yield: 65%) dec. 165 °C.  $\text{C}_{31}\text{H}_{23}\text{N}_2\text{NdO}_9$  (711.76) calculated: C 52.31, H 3.26, N 3.94, Nd 20.27%; found C 52.76, H 3.39, N 3.98, Nd 19.90%.

IR (cm<sup>-1</sup>): 3194w, 1595m, 1531m, 1505m, 1392s, 1247m, 1240m, 1167m, 1099w, 1011w, 856w, 786w, 753s, 686s.

**Sm(4hob)<sub>3</sub>(bpy)**. White precipitate (yield: 72%) dec. 180 °C. C<sub>31</sub>H<sub>23</sub>N<sub>2</sub>SmO<sub>9</sub> (717.88) calculated: C 51.87, H 3.23, N 3.90, Sm 20.94%; found C 52.34, H 3.38, N 3.95, Sm 20.67%.

IR (cm<sup>-1</sup>): 3160w, 1595m, 1531m, 1505m, 1392s, 1273m, 1240m, 1166m, 1099w, 1063w, 1011w, 856m, 786m, 758m, 737w, 699w.

**Eu(4hob)<sub>3</sub>(bpy)**. White precipitate (yield: 80%) dec. 180 °C. C<sub>31</sub>H<sub>23</sub>N<sub>2</sub>EuO<sub>9</sub> (719.49) calculated: C 50.62, H 3.15, N 3.88, Eu 20.66%; found C 51.21, H 3.25, N 3.94, Eu 20.33%.

IR (cm<sup>-1</sup>): 3161w, 1595m, 1531m, 1505m, 1386s, 1240m, 1166m, 1098w, 1011w, 855w, 785m, 757m, 699m.

**Gd(4hob)<sub>3</sub>(bpy)**. White precipitate (yield: 90%) dec. 205 °C. C<sub>31</sub>H<sub>23</sub>N<sub>2</sub>GdO<sub>9</sub> (724.77) calculated: C 50.26, H 3.13, N 3.85, Gd 21.23%; found C 50.79, H 3.30, N 3.90, Gd 21.10%.

IR (cm<sup>-1</sup>): 3182w, 1595m, 1531m, 1393s, 1245m, 1166m, 1098w, 1012w, 856m, 785m, 757m, 700w.

**Ho(4hob)<sub>3</sub>(bpy)**. Pink precipitate (yield: 55%) dec. 190 °C. C<sub>31</sub>H<sub>23</sub>N<sub>2</sub>HoO<sub>9</sub> (732.45) calculated: C 50.83, H 3.17, N 3.82, Ho 22.52%; found C 51.31, H 3.39, N 3.97, Ho 21.70%.

IR (cm<sup>-1</sup>): 3535m, 3518m, 3015w, 2969w, 1735s, 1598w, 1538w, 1418w, 1370m, 1216m, 1092w, 744m.

**Y(4hob)<sub>3</sub>(bpy)**. White precipitate (yield: 38%) dec. 162 °C. C<sub>31</sub>H<sub>23</sub>N<sub>2</sub>YO<sub>9</sub> (656.43) calculated: C 56.72, H 3.53, N 4.27, Y 13.54%; found C 57.15, H 3.74, N 4.43, Y 13.21%.

IR (cm<sup>-1</sup>): 3075w, 1632w, 1595m, 1531w, 1506w, 1457w, 1393s, 1274m, 1240m, 1167m, 1098w, 1063w, 1013w, 856w, 786m, 758m, 737w, 701w.

**Er(4hob)<sub>3</sub>(bpy)**. Pink microcrystals (yield: 86%) dec. 150 °C. C<sub>31</sub>H<sub>23</sub>N<sub>2</sub>ErO<sub>9</sub> (734.78) calculated: C 50.67, H 3.16, N 3.81, Er 22.76%; found C 50.99, H 3.31, N 3.94, Er 22.43%.

IR (cm<sup>-1</sup>): 3533w, 3113w, 1596m, 1531m, 1505m, 1397s, 1276m, 1242m, 1167m, 1098w, 1014w, 856w, 815w, 786m, 757s, 701m.

**Yb(4hob)<sub>3</sub>(bpy)**. White precipitate (yield: 86%) dec. 173 °C. C<sub>31</sub>H<sub>23</sub>N<sub>2</sub>YbO<sub>9</sub> (740.56) calculated: C 50.28, H 3.13, N 3.78, Yb 23.37%; found C 49.79, H 3.24, N 3.90, Yb 23.87%.

IR (cm<sup>-1</sup>): 3168w, 1596m, 1531m, 1508m, 1408s, 1275m, 1243m, 1167m, 1099w, 1063w, 1016w, 857w, 787m, 759m, 737w, 701w.

**Lu(4hob)<sub>3</sub>(bpy)**. White precipitate (yield: 91%) dec. 160 °C. C<sub>31</sub>H<sub>23</sub>N<sub>2</sub>LuO<sub>9</sub> (742.49) calculated: C 50.15, H 3.12, N 3.77, Lu 23.56%; found C 50.59, H 3.90, N 3.87, Lu 23.18%.

IR (cm<sup>-1</sup>): 3188w, 2888w, 1596m, 1531m, 1402s, 1246m, 1167m, 1099w, 1017w, 856m, 786m, 759m, 700w.

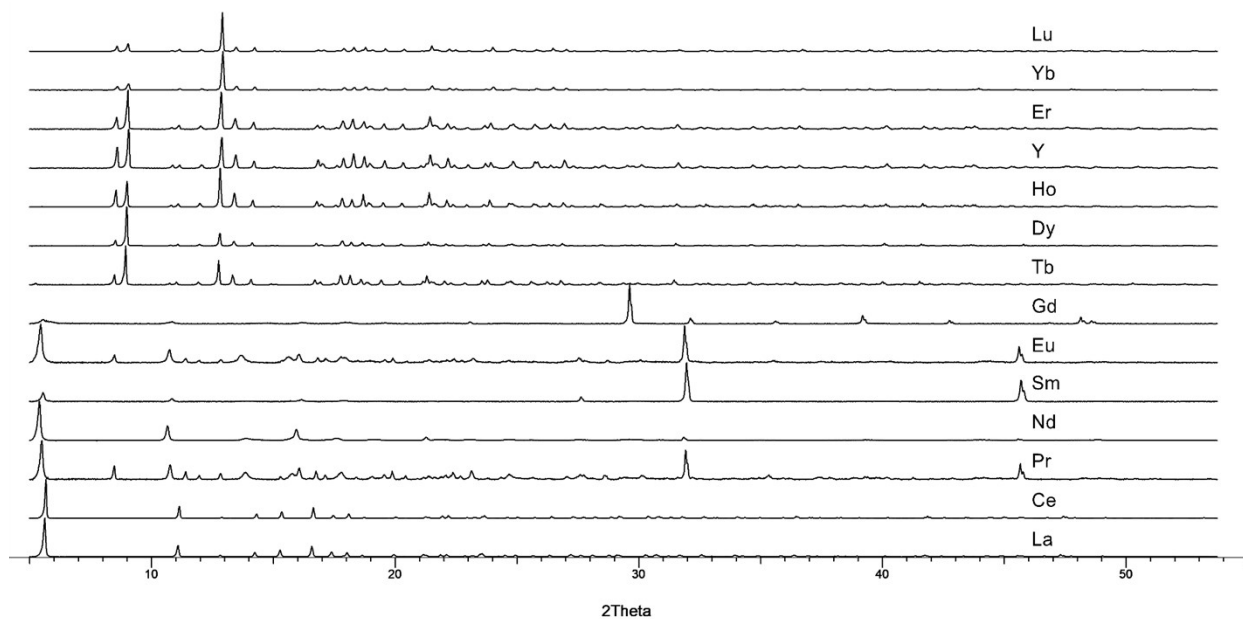

**Figure S1.** PXR D traces of the bulk products for the aqua reactions ( $2\theta$  range:  $5\text{-}55^\circ$ ). All traces are normalized to facilitate comparison.

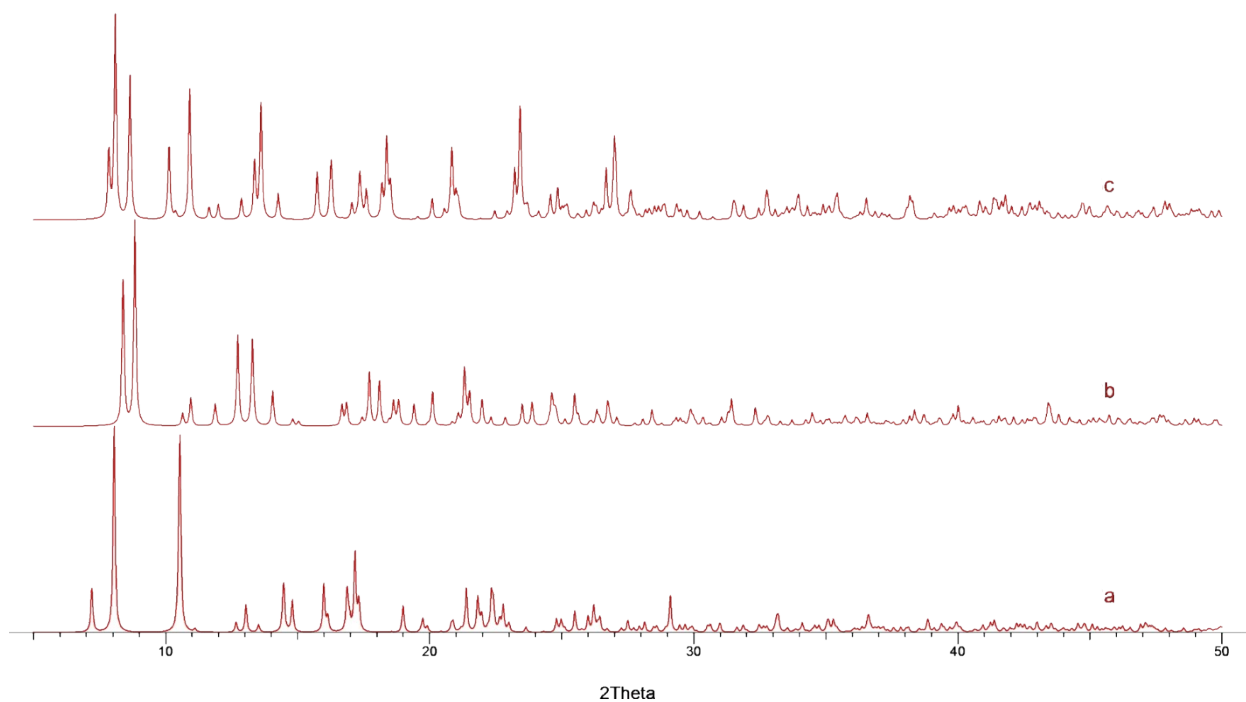

**Figure S2.** Comparison of the PXR D traces for types **a**, **b** and **c** dimers, generated from the crystal data for RE = Tb ( $2\theta$  range  $5\text{-}50^\circ$ ). The data for **c** was drawn from the CCDC (DUPWUH).

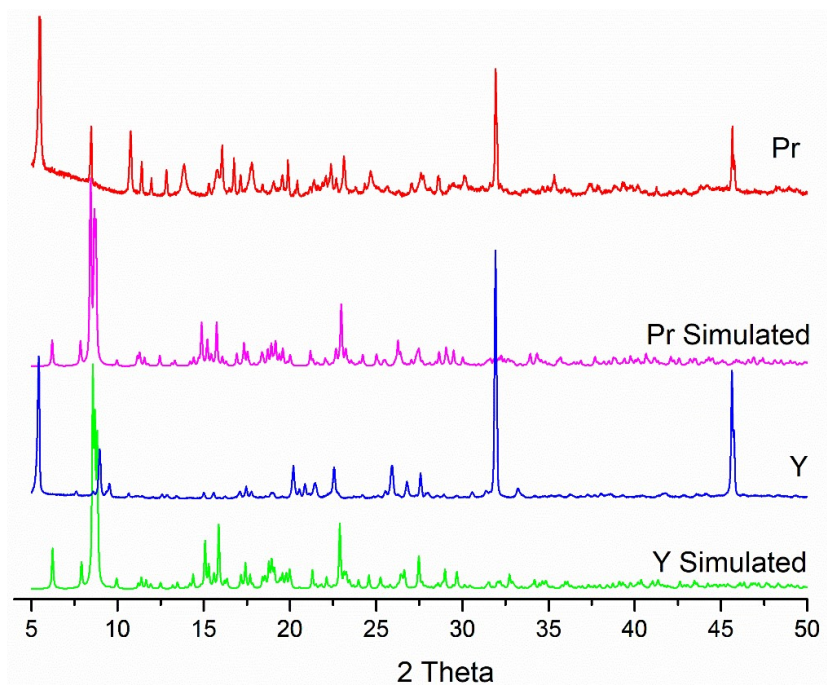

**Figure S3** PXRD traces of (4-hydroxybenzoato)Ln(III) complexes (Ln = Pr and Y) at room temperature compared to their simulated patterns ( $2\theta$  range 5-50°). The data for Y Simulated was drawn from the CCDC (BEWBAG).

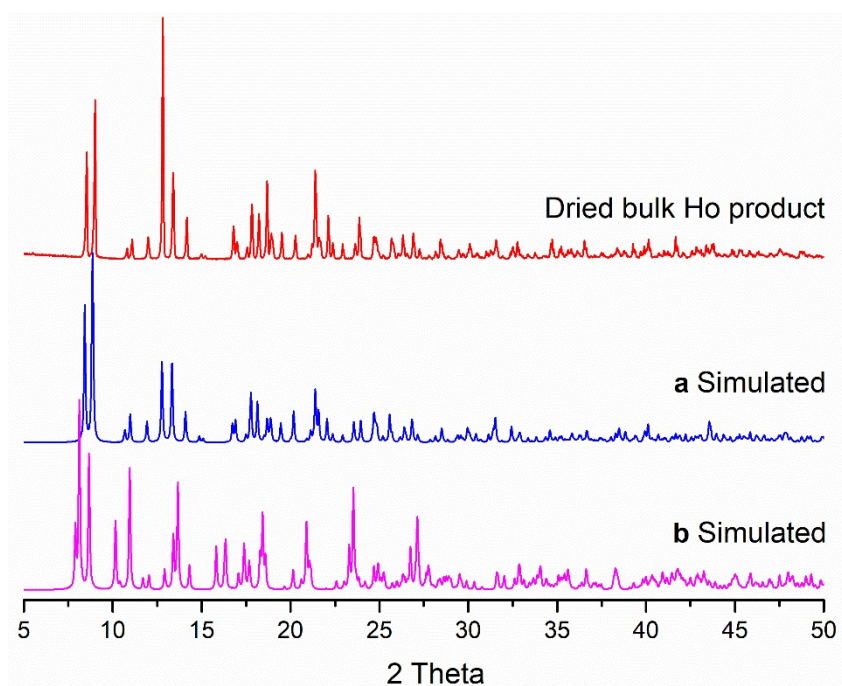

**Figure S4** PXRD traces of dried bulk Ho product at room temperature compared to its simulated patterns ( $2\theta$  range 5-50°):  $[\text{Ho}_2(4\text{hob})_6(\text{H}_2\text{O})_4]\cdot 2\text{H}_2\text{O}$  (a Simulated) and  $[\text{Ho}_2(4\text{hob})_6(\text{H}_2\text{O})_4]\cdot 10\text{H}_2\text{O}$  (b Simulated).

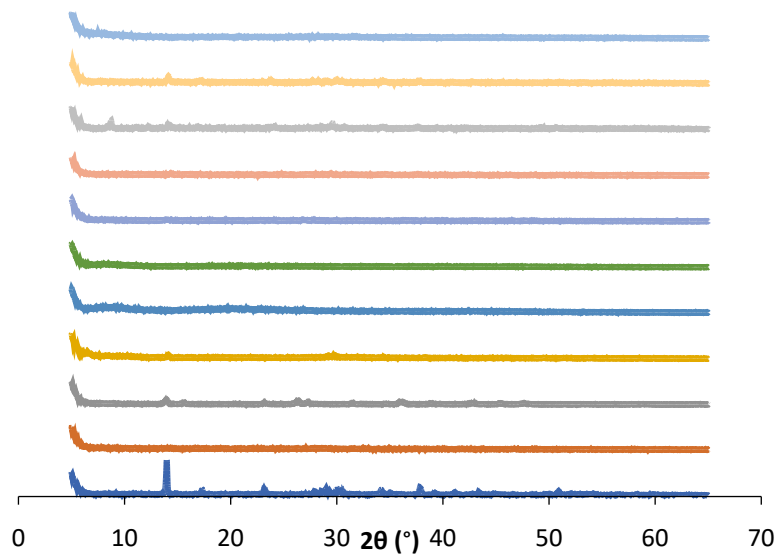

**Figure S5.** PXR D traces for  $[\text{RE}(\text{4hob})_3(\text{bpy})]_2$  (RE = Pr, Nd, Sm, Eu, Gd, Tb, Dy, Er, Yb, Lu, Y) bulk products at room temperature ( $2\theta$  range:  $5\text{-}55^\circ$ ).

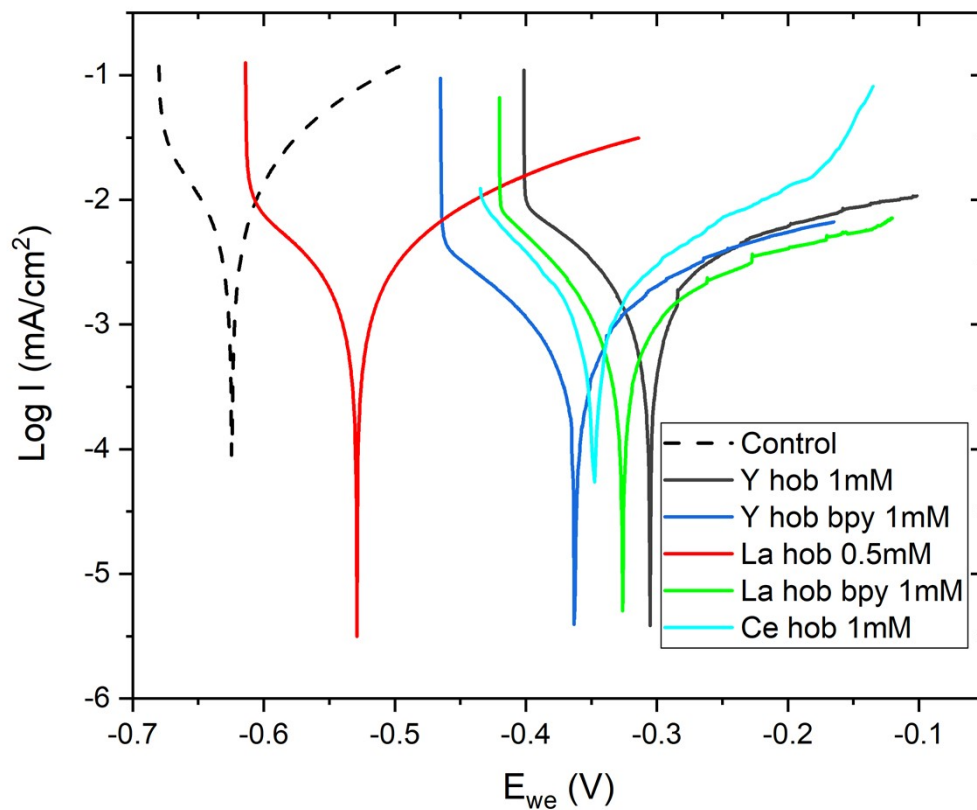

**Figure S6.** Tafel plots for AS1020 mild steel after 24 h in control and inhibitor solutions.

**Table S1.** Hydrogen bonding Parameters [d/Å and </math>°] for the compounds

| D-H...A                                                                                             | d(D-H)     | d(H...A)   | d(D...A) | <(DHA)     |
|-----------------------------------------------------------------------------------------------------|------------|------------|----------|------------|
| <b>a. [La(4hob)<sub>3</sub>(H<sub>2</sub>O)<sub>2</sub>]<sub>n</sub></b>                            |            |            |          |            |
| O2-H2A...O7*                                                                                        | 0.8710(15) | 1.9584(15) | 2.806(2) | 164.2(1)   |
| O2-H2B...O7#                                                                                        | 0.8711(15) | 2.0779(15) | 2.873(2) | 151.46(11) |
| <b>b. [Pr<sub>4</sub>(4hob)<sub>12</sub>(H<sub>2</sub>O)<sub>8</sub>]<sub>4</sub>H<sub>2</sub>O</b> |            |            |          |            |
| O4-H4B...O16*                                                                                       | 0.9905(16) | 1.7526(14) | 2.738(2) | 172.89(13) |
| O3-H3A...O5#                                                                                        | 0.8506(16) | 1.8291(16) | 2.677(2) | 174.61(14) |
| O2#-H2B#...O15                                                                                      | 0.8539(16) | 1.9799(16) | 2.833(2) | 177.52(13) |
| <b>c. [Tb<sub>2</sub>(4hob)<sub>6</sub>(H<sub>2</sub>O)<sub>4</sub>]<sub>4</sub>H<sub>2</sub>O</b>  |            |            |          |            |
| O12-H12A...O3*                                                                                      | 0.850(3)   | 1.8774(17) | 2.721(3) | 171.0(2)   |
| <b>d. [Dy<sub>2</sub>(4hob)<sub>6</sub>(H<sub>2</sub>O)<sub>4</sub>]<sub>2</sub>H<sub>2</sub>O</b>  |            |            |          |            |
| O1-H1B...O8                                                                                         | 0.861(2)   | 1.934(2)   | 2.741(3) | 155.53(18) |
| <b>e. [Y<sub>2</sub>(4hob)<sub>6</sub>(H<sub>2</sub>O)<sub>6</sub>]<sub>10</sub>H<sub>2</sub>O</b>  |            |            |          |            |
| O2-H2B...O6'                                                                                        | 0.850(2)   | 2.1701(18) | 2.93(3)  | 149.30(13) |

**Table S2.** Selected distances and bond lengths (Å) for the type **b** dimers, [RE<sub>2</sub>(4hob)<sub>6</sub>(H<sub>2</sub>O)<sub>4</sub>]<sub>2</sub>H<sub>2</sub>O.

| RE:    | Eu        | Gd         | Tb         | Dy        | Ho         | Y          | Er        | Yb        | Lu        |
|--------|-----------|------------|------------|-----------|------------|------------|-----------|-----------|-----------|
| RE-RE  | 5.0393(3) | 5.0331(9)  | 5.0167(3)  | 5.0067(6) | 4.9931(3)  | 4.9876(3)  | 4.9718(5) | 4.9402(4) | 4.9358(3) |
| RE-O1  | 2.359(2)  | 2.3607(17) | 2.3397(17) | 2.330(3)  | 2.325(2)   | 2.3179(12) | 2.308(2)  | 2.283(3)  | 2.281(3)  |
| RE-O2  | 2.418(2)  | 2.4206(17) | 2.4007(17) | 2.406(3)  | 2.386(2)   | 2.3779(12) | 2.373(3)  | 2.346(3)  | 2.347(3)  |
| RE-O3  | 2.412(2)  | 2.4114(16) | 2.3986(17) | 2.376(2)  | 2.369(2)   | 2.3668(12) | 2.350(2)  | 2.332(3)  | 2.324(2)  |
| RE-O4  | 2.444(2)  | 2.4492(18) | 2.4281(17) | 2.415(2)  | 2.402(2)   | 2.4063(12) | 2.390(2)  | 2.365(3)  | 2.368(2)  |
| RE-O5  | 2.479(2)  | 2.4748(17) | 2.4648(18) | 2.451(2)  | 2.436(2)   | 2.4468(12) | 2.426(3)  | 2.413(3)  | 2.414(2)  |
| RE-O6  | 2.393(2)  | 2.3987(17) | 2.3730(18) | 2.368(2)  | 2.355(2)   | 2.3532(12) | 2.342(3)  | 2.317(3)  | 2.313(2)  |
| RE-O7  | 2.327(2)  | 2.3278(17) | 2.3073(17) | 2.292(2)  | 2.283(2)   | 2.2829(12) | 2.267(2)  | 2.239(3)  | 2.243(2)  |
| RE-O8' | 2.349(2)  | 2.3482(17) | 2.3312(18) | 2.316(2)  | 2.3045(19) | 2.3006(12) | 2.288(2)  | 2.273(3)  | 2.263(2)  |

**Table S3.** Selected distances and bond lengths (Å) for the type **c** dimers, [RE<sub>2</sub>(4hob)<sub>6</sub>(H<sub>2</sub>O)<sub>6</sub>]<sub>10</sub>H<sub>2</sub>O. Data for RE = Tb is drawn from CCDC code DUPWUH.

| RE:   | Tb         | Ho         | Y          | Er         |
|-------|------------|------------|------------|------------|
| RE-O1 | 2.4482(19) | 2.4205(17) | 2.4316(17) | 2.3132(14) |
| RE-O2 | 2.423(2)   | 2.3991(16) | 2.4118(16) | 2.3923(14) |

|        |            |            |            |            |
|--------|------------|------------|------------|------------|
| RE-O3  | 2.4042(17) | 2.3789(17) | 2.3807(18) | 2.3697(14) |
| RE-O4  | 2.4276(19) | 2.4026(17) | 2.3974(19) | 2.3908(14) |
| RE-O5  | 2.4387(17) | 2.4167(17) | 2.4246(19) | 2.4103(15) |
| RE-O6  | 2.3161(14) | 2.2930(16) | 2.3004(15) | 2.2848(13) |
| RE-O7' | 2.3276(18) | 2.3012(16) | 2.2985(19) | 2.2973(14) |
| RE-O8  | 2.2790(17) | 2.2593(16) | 2.2569(17) | 2.2511(14) |

## X-ray crystallography

Complexes  $[\text{Pr}_4(4\text{hob})_{12}(\text{H}_2\text{O})_8]\cdot 4\text{H}_2\text{O}$ ,  $[\text{Tb}_2(4\text{hob})_6(\text{H}_2\text{O})_4]\cdot 4\text{H}_2\text{O}$ ,  $[\text{Dy}_2(4\text{hob})_6(\text{H}_2\text{O})_4]\cdot 2\text{H}_2\text{O}$ ,  $[\text{Y}_2(4\text{hob})_6(\text{H}_2\text{O})_6]\cdot 10\text{H}_2\text{O}$ ,  $[\text{Er}_2(4\text{hob})_6(\text{H}_2\text{O})_4]\cdot 2\text{H}_2\text{O}$ ,  $[\text{Yb}_2(4\text{hob})_6(\text{H}_2\text{O})_4]\cdot 2\text{H}_2\text{O}$ ,  $[\text{Lu}_2(4\text{hob})_6(\text{H}_2\text{O})_4]\cdot 2\text{H}_2\text{O}$ ,  $[\text{Tb}_2(4\text{hob})_6(\text{bpy})_2]\cdot 2\text{bpy}\cdot 4\text{H}_2\text{O}$  and  $[\text{Dy}_2(4\text{hob})_6(\text{bpy})_2]\cdot 2\text{bpy}\cdot 4\text{H}_2\text{O}$  were measured on a Bruker APEX-II CCD diffractometer equipped with graphite-monochromated Mo-K $\alpha$  radiation ( $\lambda = 0.71073 \text{ \AA}$ ) at 123 K. Absorption corrections were completed using Apex II program suite using SADABS.<sup>1</sup> Complexes  $[\text{La}(4\text{hob})_3(\text{H}_2\text{O})_2]_n$  and  $[\text{Gd}_2(4\text{hob})_6(\text{H}_2\text{O})_4]\cdot 2\text{H}_2\text{O}$  were measured at the Australian Synchrotron on the MX1 beamline, data integration was completed using Blue-ice<sup>2</sup> and XDS<sup>3</sup> software programs. Others were measured on a Rigaku SynergyS diffractometer at 123 K. The SynergyS operated using microsource Mo-K $\alpha$  radiation ( $\lambda = 0.71073 \text{ \AA}$ ) for complex  $[\text{Er}_2(4\text{hob})_6(\text{H}_2\text{O})_6]\cdot 10\text{H}_2\text{O}$  or Cu-K $\alpha$  radiation ( $\lambda = 1.54184 \text{ \AA}$ ) for complexes  $\{[\text{Ce}(4\text{hob})_3(\text{H}_2\text{O})_2]\cdot 3\text{H}_2\text{O}\}_n$ ,  $\{[\text{Y}(4\text{hob})_3]\cdot \text{H}_2\text{O}\}_n$ ,  $[\text{Eu}_2(4\text{hob})_6(\text{H}_2\text{O})_4]\cdot 2\text{H}_2\text{O}$ ,  $[\text{Tb}_2(4\text{hob})_6(\text{H}_2\text{O})_4]\cdot 2\text{H}_2\text{O}$ ,  $[\text{Ho}_2(4\text{hob})_6(\text{H}_2\text{O})_4]\cdot 2\text{H}_2\text{O}$ ,  $[\text{Ho}_2(4\text{hob})_6(\text{H}_2\text{O})_6]\cdot 10\text{H}_2\text{O}$ ,  $[\text{Y}_2(4\text{hob})_6(\text{H}_2\text{O})_4]\cdot 2\text{H}_2\text{O}$ . Data processing was conducted using CrysAlisPro.55 software suite.<sup>4</sup> Structural solutions were obtained by either direct methods<sup>5</sup> or charge flipping<sup>6</sup> methods and refined using full-matrix least-squares methods against  $F^2$  using SHELX2018,<sup>7</sup> in conjunction with the Olex2<sup>8</sup> graphical user interface. All hydrogen atoms were placed in calculated positions using the riding model. Crystal data and refinement details are given in **Table S3**.



**Table S4.** Structural and refinement data for RE-4hob species.

|                                                    | [La(4hob) <sub>3</sub> (H <sub>2</sub> O) <sub>2</sub> ] <sub>n</sub> | {[Ce(4hob) <sub>3</sub> (H <sub>2</sub> O) <sub>2</sub> ] <sub>3</sub> ·3H <sub>2</sub> O} <sub>n</sub> | [Pr <sub>4</sub> (4hob) <sub>12</sub> (H <sub>2</sub> O) <sub>8</sub> ] <sub>4</sub> ·4H <sub>2</sub> O | [Tb <sub>2</sub> (4hob) <sub>6</sub> (H <sub>2</sub> O) <sub>4</sub> ] <sub>4</sub> ·4H <sub>2</sub> O | [Eu <sub>2</sub> (4hob) <sub>6</sub> (H <sub>2</sub> O) <sub>4</sub> ] <sub>2</sub> ·2H <sub>2</sub> O |
|----------------------------------------------------|-----------------------------------------------------------------------|---------------------------------------------------------------------------------------------------------|---------------------------------------------------------------------------------------------------------|--------------------------------------------------------------------------------------------------------|--------------------------------------------------------------------------------------------------------|
| Formula                                            | C <sub>21</sub> H <sub>19</sub> LaO <sub>11</sub>                     | C <sub>21</sub> H <sub>25</sub> CeO <sub>14</sub>                                                       | C <sub>84</sub> H <sub>84</sub> O <sub>48</sub> Pr <sub>4</sub>                                         | C <sub>42</sub> H <sub>46</sub> O <sub>26</sub> Tb <sub>2</sub>                                        | C <sub>42</sub> H <sub>42</sub> Eu <sub>2</sub> O <sub>24</sub>                                        |
| <i>M<sub>r</sub></i>                               | 586.27                                                                | 641.53                                                                                                  | 2425.15                                                                                                 | 1284.63                                                                                                | 1234.67                                                                                                |
| Space group                                        | <i>P</i> 2 <sub>1</sub> / <i>c</i>                                    | <i>P</i> -1                                                                                             | <i>P</i> -1                                                                                             | <i>P</i> -1                                                                                            | <i>P</i> 2 <sub>1</sub> / <i>c</i>                                                                     |
| <i>a</i> (Å)                                       | 16.215(3)                                                             | 6.36120(10)                                                                                             | 12.0467(3)                                                                                              | 9.0067(7)                                                                                              | 10.4168(3)                                                                                             |
| <i>b</i> (Å)                                       | 12.467(3)                                                             | 10.0317(2)                                                                                              | 14.1840(4)                                                                                              | 11.0069(9)                                                                                             | 14.9277(5)                                                                                             |
| <i>c</i> (Å)                                       | 10.233(2)                                                             | 19.6952(9)                                                                                              | 14.6821(4)                                                                                              | 12.9695(10)                                                                                            | 15.5044(5)                                                                                             |
| <i>α</i> (°)                                       | 90                                                                    | 104.267(3)                                                                                              | 93.1860(10)                                                                                             | 91.8950(10)                                                                                            | 90                                                                                                     |
| <i>β</i> (°)                                       | 94.01(3)                                                              | 93.474(3)                                                                                               | 102.7450(10)                                                                                            | 108.879(2)                                                                                             | 105.9590(10)                                                                                           |
| <i>γ</i> (°)                                       | 90                                                                    | 96.567(2)                                                                                               | 105.5620(10)                                                                                            | 93.5260(10)                                                                                            | 90                                                                                                     |
| <i>V</i> (Å <sup>3</sup> )                         | 2063.6(7)                                                             | 1204.91(7)                                                                                              | 2339.57(11)                                                                                             | 1212.36(17)                                                                                            | 2318.00(13)                                                                                            |
| <i>Z</i>                                           | 4                                                                     | 2                                                                                                       | 1                                                                                                       | 1                                                                                                      | 2                                                                                                      |
| <i>ρ</i> <sub>calc</sub> , g cm <sup>-3</sup>      | 1.887                                                                 | 1.768                                                                                                   | 1.721                                                                                                   | 1.760                                                                                                  | 1.769                                                                                                  |
| <i>μ</i> , mm <sup>-1</sup>                        | 2.134                                                                 | 15.248                                                                                                  | 2.145                                                                                                   | 2.982                                                                                                  | 19.940                                                                                                 |
| <i>N<sub>r</sub></i>                               | 26356                                                                 | 4963                                                                                                    | 51444                                                                                                   | 8275                                                                                                   | 24759                                                                                                  |
| <i>N</i> ( <i>R</i> <sub>int</sub> )               | 4444(0.0259)                                                          | 4963                                                                                                    | 13334(0.0539)                                                                                           | 5757(0.0230)                                                                                           | 4842(0.0595)                                                                                           |
| <i>R</i> <sub>1</sub> ( <i>I</i> > 2σ( <i>I</i> )) | 0.0207                                                                | 0.1128                                                                                                  | 0.0314                                                                                                  | 0.0278                                                                                                 | 0.0355                                                                                                 |
| <i>wR</i> <sub>2</sub> (all data)                  | 0.0540                                                                | 0.2855                                                                                                  | 0.0785                                                                                                  | 0.0723                                                                                                 | 0.0988                                                                                                 |
| GOF                                                | 1.096                                                                 | 1.358                                                                                                   | 1.027                                                                                                   | 1.071                                                                                                  | 1.060                                                                                                  |

|                                                    | [Gd <sub>2</sub> (4hob) <sub>6</sub> (H <sub>2</sub> O) <sub>4</sub> ].2H <sub>2</sub> O | [Tb <sub>2</sub> (4hob) <sub>6</sub> (H <sub>2</sub> O) <sub>4</sub> ].2H <sub>2</sub> O | [Dy <sub>2</sub> (4hob) <sub>6</sub> (H <sub>2</sub> O) <sub>4</sub> ].2H <sub>2</sub> O | [Ho <sub>2</sub> (4hob) <sub>6</sub> (H <sub>2</sub> O) <sub>4</sub> ].2H <sub>2</sub> O | [Y <sub>2</sub> (4hob) <sub>6</sub> (H <sub>2</sub> O) <sub>4</sub> ].2H <sub>2</sub> O |
|----------------------------------------------------|------------------------------------------------------------------------------------------|------------------------------------------------------------------------------------------|------------------------------------------------------------------------------------------|------------------------------------------------------------------------------------------|-----------------------------------------------------------------------------------------|
| Formula                                            | C <sub>42</sub> H <sub>42</sub> Gd <sub>2</sub> O <sub>24</sub>                          | C <sub>42</sub> H <sub>42</sub> O <sub>24</sub> Tb <sub>2</sub>                          | C <sub>42</sub> H <sub>42</sub> Dy <sub>2</sub> O <sub>24</sub>                          | C <sub>42</sub> H <sub>42</sub> Ho <sub>2</sub> O <sub>24</sub>                          | C <sub>42</sub> H <sub>42</sub> O <sub>24</sub> Y <sub>2</sub>                          |
| <i>M<sub>r</sub></i>                               | 1245.25                                                                                  | 1248.59                                                                                  | 1255.75                                                                                  | 1260.61                                                                                  | 1108.57                                                                                 |
| Space group                                        | <i>P</i> 2 <sub>1</sub> / <i>c</i>                                                       | <i>P</i> 2 <sub>1</sub> / <i>c</i>                                                      |
| <i>a</i> (Å)                                       | 10.4100(3)                                                                               | 10.39280(10)                                                                             | 10.4033(3)                                                                               | 10.3692(3)                                                                               | 10.37330(10)                                                                            |
| <i>b</i> (Å)                                       | 14.9000(5)                                                                               | 14.9032(2)                                                                               | 14.8810(5)                                                                               | 14.8578(5)                                                                               | 14.88310(10)                                                                            |
| <i>c</i> (Å)                                       | 15.5100(5)                                                                               | 15.4634(2)                                                                               | 15.5628(5)                                                                               | 15.4168(5)                                                                               | 15.43080(10)                                                                            |
| <i>α</i> (°)                                       | 90                                                                                       | 90                                                                                       | 90                                                                                       | 90                                                                                       | 90                                                                                      |
| <i>β</i> (°)                                       | 105.9610(10)                                                                             | 105.8680(10)                                                                             | 105.9720(10)                                                                             | 105.8910(10)                                                                             | 105.8630(10)                                                                            |
| <i>γ</i> (°)                                       | 90                                                                                       | 90                                                                                       | 90                                                                                       | 90                                                                                       | 90                                                                                      |
| <i>V</i> (Å <sup>3</sup> )                         | 2313.00(13)                                                                              | 2303.80(5)                                                                               | 2316.29(13)                                                                              | 2284.40(13)                                                                              | 2291.59(3)                                                                              |
| <i>Z</i>                                           | 2                                                                                        | 2                                                                                        | 2                                                                                        | 2                                                                                        | 2                                                                                       |
| <i>ρ</i> <sub>calc</sub> , g cm <sup>-3</sup>      | 1.788                                                                                    | 1.800                                                                                    | 1.800                                                                                    | 1.833                                                                                    | 1.607                                                                                   |
| <i>μ</i> , mm <sup>-1</sup>                        | 2.930                                                                                    | 15.670                                                                                   | 3.289                                                                                    | 7.048                                                                                    | 4.163                                                                                   |
| <i>N<sub>τ</sub></i>                               | 38190                                                                                    | 24578                                                                                    | 34051                                                                                    | 24375                                                                                    | 42965                                                                                   |
| <i>N</i> ( <i>R</i> <sub>int</sub> )               | 4213(0.0358)                                                                             | 4808(0.0437)                                                                             | 5313(0.0701)                                                                             | 4773(0.0397)                                                                             | 4773(0.0338)                                                                            |
| <i>R</i> <sub>1</sub> ( <i>I</i> > 2σ( <i>I</i> )) | 0.0199                                                                                   | 0.0256                                                                                   | 0.0319                                                                                   | 0.0277                                                                                   | 0.0253                                                                                  |
| <i>wR</i> <sub>2</sub> (all data)                  | 0.0520                                                                                   | 0.0649                                                                                   | 0.0820                                                                                   | 0.0750                                                                                   | 0.0702                                                                                  |
| GOF                                                | 1.138                                                                                    | 1.050                                                                                    | 1.119                                                                                    | 1.120                                                                                    | 1.106                                                                                   |

|                                                    | [Er <sub>2</sub> (4hob) <sub>6</sub> (H <sub>2</sub> O) <sub>4</sub> ].2H <sub>2</sub> O | [Yb <sub>2</sub> (4hob) <sub>6</sub> (H <sub>2</sub> O) <sub>4</sub> ].2H <sub>2</sub> O | [Lu <sub>2</sub> (4hob) <sub>6</sub> (H <sub>2</sub> O) <sub>4</sub> ].2H <sub>2</sub> O | [Ho <sub>2</sub> (4hob) <sub>6</sub> (H <sub>2</sub> O) <sub>6</sub> ].10H <sub>2</sub> O | [Y <sub>2</sub> (4hob) <sub>6</sub> (H <sub>2</sub> O) <sub>6</sub> ].10H <sub>2</sub> O |
|----------------------------------------------------|------------------------------------------------------------------------------------------|------------------------------------------------------------------------------------------|------------------------------------------------------------------------------------------|-------------------------------------------------------------------------------------------|------------------------------------------------------------------------------------------|
| Formula                                            | C <sub>42</sub> H <sub>42</sub> Er <sub>2</sub> O <sub>24</sub>                          | C <sub>42</sub> H <sub>42</sub> O <sub>24</sub> Yb <sub>2</sub>                          | C <sub>42</sub> H <sub>42</sub> Lu <sub>2</sub> O <sub>24</sub>                          | C <sub>42</sub> H <sub>62</sub> Ho <sub>2</sub> O <sub>34</sub>                           | C <sub>42</sub> H <sub>62</sub> O <sub>34</sub> Y <sub>2</sub>                           |
| <i>M<sub>r</sub></i>                               | 1265.27                                                                                  | 1276.83                                                                                  | 1280.69                                                                                  | 1440.77                                                                                   | 1288.73                                                                                  |
| Space group                                        | <i>P</i> 2 <sub>1</sub> / <i>c</i>                                                       | <i>P</i> 2 <sub>1</sub> / <i>c</i>                                                       | <i>P</i> 2 <sub>1</sub> / <i>c</i>                                                       | <i>P</i> -1                                                                               | <i>P</i> -1                                                                              |
| <i>a</i> (Å)                                       | 10.3698(3)                                                                               | 10.3616(3)                                                                               | 10.3683(3)                                                                               | 10.8167(2)                                                                                | 10.7986(9)                                                                               |
| <i>b</i> (Å)                                       | 14.8378(5)                                                                               | 14.8065(5)                                                                               | 14.8139(5)                                                                               | 11.3009(2)                                                                                | 11.4256(9)                                                                               |
| <i>c</i> (Å)                                       | 15.5102(5)                                                                               | 15.4569(5)                                                                               | 15.4882(5)                                                                               | 11.45320(10)                                                                              | 11.6045(9)                                                                               |
| <i>α</i> (°)                                       | 90                                                                                       | 90                                                                                       | 90                                                                                       | 90.5010(10)                                                                               | 90.629(2)                                                                                |
| <i>β</i> (°)                                       | 106.0290(10)                                                                             | 105.8930(10)                                                                             | 105.9210(10)                                                                             | 101.7230(10)                                                                              | 100.564(2)                                                                               |
| <i>γ</i> (°)                                       | 90                                                                                       | 90                                                                                       | 90                                                                                       | 105.3020(10)                                                                              | 105.4750(10)                                                                             |
| <i>V</i> (Å <sup>3</sup> )                         | 2293.70(13)                                                                              | 2280.74(13)                                                                              | 2287.66(13)                                                                              | 1319.33(4)                                                                                | 1353.76(19)                                                                              |
| <i>Z</i>                                           | 2                                                                                        | 2                                                                                        | 2                                                                                        | 1                                                                                         | 1                                                                                        |
| <i>ρ</i> <sub>calc</sub> , g cm <sup>-3</sup>      | 1.832                                                                                    | 1.859                                                                                    | 1.859                                                                                    | 1.813                                                                                     | 1.581                                                                                    |
| <i>μ</i> , mm <sup>-1</sup>                        | 3.722                                                                                    | 4.164                                                                                    | 4.379                                                                                    | 6.333                                                                                     | 2.233                                                                                    |
| <i>N<sub>r</sub></i>                               | 25669                                                                                    | 24650                                                                                    | 36496                                                                                    | 26548                                                                                     | 9360                                                                                     |
| <i>N</i> ( <i>R</i> <sub>int</sub> )               | 5273(0.0675)                                                                             | 4017(0.0737)                                                                             | 5243(0.0661)                                                                             | 5499(0.0434)                                                                              | 6426(0.0153)                                                                             |
| <i>R</i> <sub>1</sub> ( <i>I</i> > 2σ( <i>I</i> )) | 0.0325                                                                                   | 0.0333                                                                                   | 0.0305                                                                                   | 0.0318                                                                                    | 0.0351                                                                                   |
| w <i>R</i> <sub>2</sub> (all data)                 | 0.0872                                                                                   | 0.0874                                                                                   | 0.0844                                                                                   | 0.0826                                                                                    | 0.0969                                                                                   |
| GOF                                                | 1.070                                                                                    | 1.046                                                                                    | 1.057                                                                                    | 1.083                                                                                     | 1.052                                                                                    |

|                                                    | [Er <sub>2</sub> (4hob) <sub>6</sub> (H <sub>2</sub> O) <sub>6</sub> ].10H <sub>2</sub> O | [(Y(4hob) <sub>3</sub> ·H <sub>2</sub> O)] <sub>n</sub> | [Tb <sub>2</sub> (4hob) <sub>6</sub> (bpy) <sub>2</sub> ].2bpy·4H <sub>2</sub> O | [Dy <sub>2</sub> (4hob) <sub>6</sub> (bpy) <sub>2</sub> ].2bpy·4H <sub>2</sub> O |
|----------------------------------------------------|-------------------------------------------------------------------------------------------|---------------------------------------------------------|----------------------------------------------------------------------------------|----------------------------------------------------------------------------------|
| Formula                                            | C <sub>42</sub> H <sub>62</sub> Er <sub>2</sub> O <sub>34</sub>                           | C <sub>21</sub> H <sub>17</sub> O <sub>10</sub> Y       | C <sub>82</sub> H <sub>70</sub> N <sub>8</sub> O <sub>22</sub> Tb <sub>2</sub>   | C <sub>82</sub> H <sub>70</sub> Dy <sub>2</sub> N <sub>8</sub> O <sub>22</sub>   |
| <i>M<sub>r</sub></i>                               | 1445.43                                                                                   | 518.26                                                  | 1837.30                                                                          | 1844.46                                                                          |
| Space group                                        | <i>P</i> -1                                                                               | <i>P</i> -1                                             | <i>P</i> 2 <sub>1</sub> / <i>n</i>                                               | <i>P</i> -1                                                                      |
| <i>a</i> (Å)                                       | 10.8172(2)                                                                                | 5.29940(10)                                             | 17.3213(6)                                                                       | 17.3138(5)                                                                       |
| <i>b</i> (Å)                                       | 11.3109(2)                                                                                | 12.1464(2)                                              | 13.1760(4)                                                                       | 13.1899(4)                                                                       |
| <i>c</i> (Å)                                       | 11.44570(10)                                                                              | 17.0480(3)                                              | 19.1799(6)                                                                       | 19.1424(6)                                                                       |
| <i>α</i> (°)                                       | 90.5310(10)                                                                               | 92.421(2)                                               | 90                                                                               | 90                                                                               |
| <i>β</i> (°)                                       | 101.7250(10)                                                                              | 97.081(2)                                               | 113.2410(10)                                                                     | 113.1660(10)                                                                     |
| <i>γ</i> (°)                                       | 105.3210(10)                                                                              | 101.336(2)                                              | 90                                                                               | 90                                                                               |
| <i>V</i> (Å <sup>3</sup> )                         | 1319.51(4)                                                                                | 1065.25(3)                                              | 4022.1(2)                                                                        | 4019.0(2)                                                                        |
| <i>Z</i>                                           | 1                                                                                         | 2                                                       | 2                                                                                | 2                                                                                |
| <i>ρ</i> <sub>calc.</sub> , g cm <sup>-3</sup>     | 1.819                                                                                     | 1.616                                                   | 1.517                                                                            | 1.524                                                                            |
| <i>μ</i> , mm <sup>-1</sup>                        | 3.261                                                                                     | 4.363                                                   | 1.823                                                                            | 1.924                                                                            |
| <i>N<sub>r</sub></i>                               | 36333                                                                                     | 20531                                                   | 56091                                                                            | 48794                                                                            |
| <i>N</i> ( <i>R</i> <sub>int</sub> )               | 8024(0.0481)                                                                              | 4365(0.0573)                                            | 11752(0.0601)                                                                    | 9227(0.0723)                                                                     |
| <i>R</i> <sub>1</sub> ( <i>I</i> > 2σ( <i>I</i> )) | 0.0242                                                                                    | 0.0386                                                  | 0.0350                                                                           | 0.0367                                                                           |
| <i>wR</i> <sub>2</sub> (all data)                  | 0.0511                                                                                    | 0.1076                                                  | 0.0836                                                                           | 0.1014                                                                           |
| GOF                                                | 1.037                                                                                     | 1.093                                                   | 1.000                                                                            | 1.047                                                                            |

## References

1. Sheldrick, G. M. SADABS; University of Gottingen, Gcöttingen (Germany), 1996.
2. T. M. McPhillips, S. E. McPhillips, H. J. Chiu, A. E. Cohen, A. M. Deacon, P. J. Ellis, E. Garman, A. Gonzalez, N. K. Sauter, R. P. Phizackerley, S. M. Soltis, J. P. Kuhn, *J. Synchrotron Radiat.* 2002, 9, 401-406.
3. W. Kabsch, *J. Appl. Crystallogr.* 1993, 26, 795.
4. CrysAlisPRO v.39. Agilent Technologies Ltd., Yarnton, Oxfordshire, England.
5. G. M. Sheldrick, *Acta Crystallogr. Sect. A.* 2008, 64, 112-122.
6. O. V. Dolomanov, L. J. Bourhis, R. J. Gildea, J. A. K. Howard, H. Puschmann, *J. Appl. Crystallogr.*, 2009, 42, 339-341.
7. G. M. Sheldrick, *Acta Cryst.* 2015, C71, 3-8.
8. L. L. J. Barbour, *J. Supramol. Chem.*, 2001, 1, 189-191.
